# Supplementary material for: Systems Perturbation Analysis of a Large-Scale Signal Transduction Model Reveals Potentially Influential Candidates for Cancer Therapeutics
Source: PubMed Central journal article supplement (PMC4750464; doi:10.3389/fbioe.2016.00010), 2016-02-11
Supplement: Figures_S2.pdf [file Figures_S2.pdf]

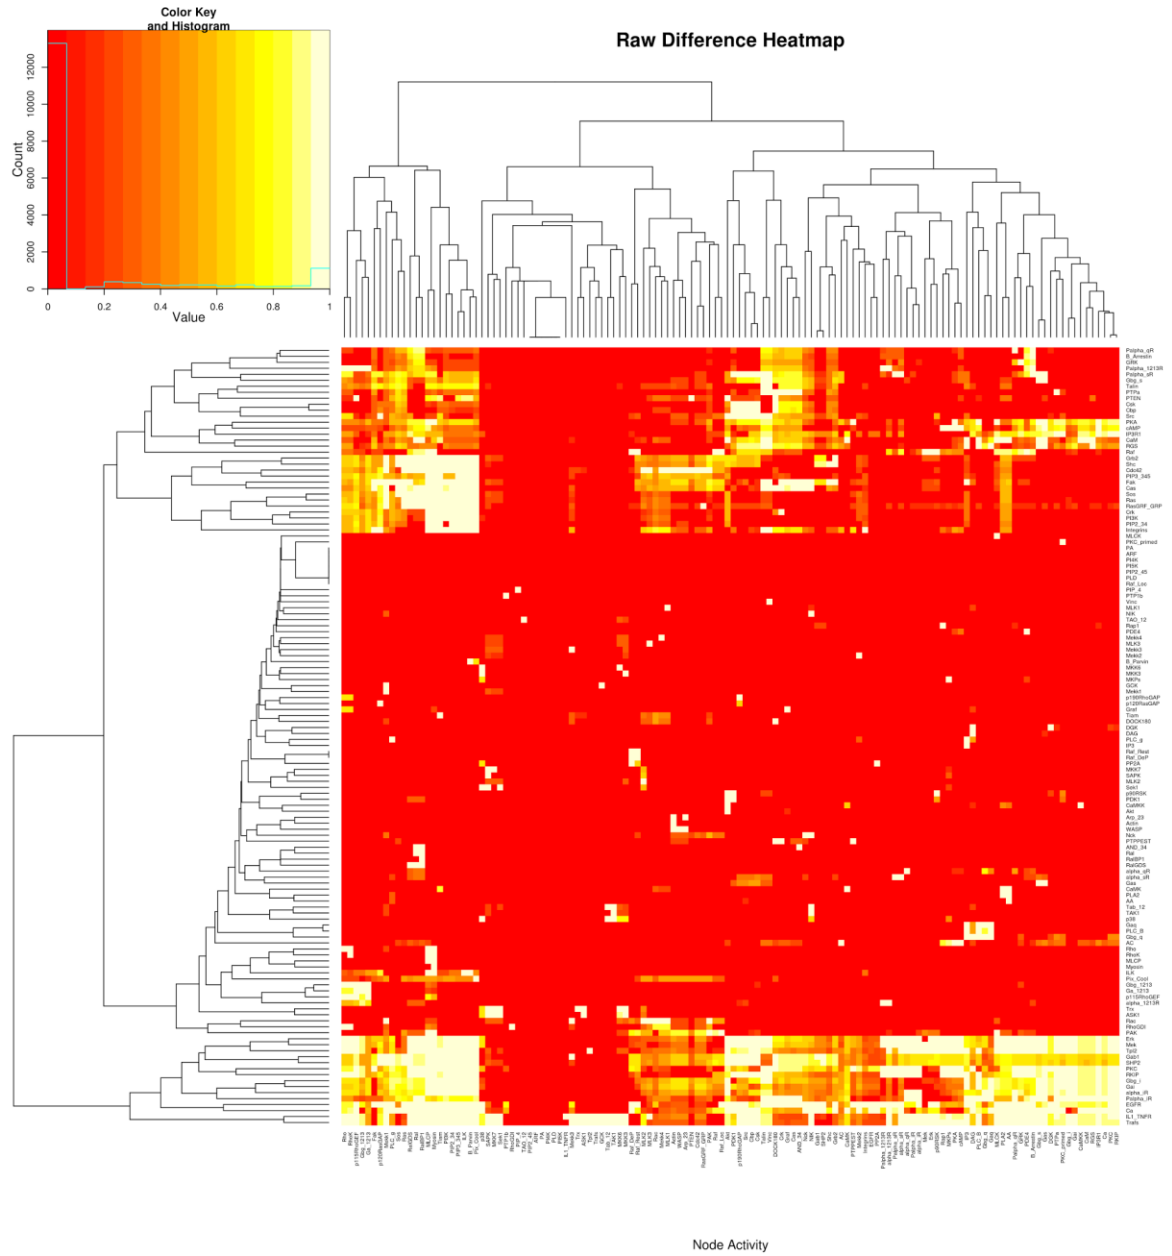

Figure S2: Cell death condition; activating perturbations.
